# Supplementary material
Source: PubMed Central journal article supplement (PMC7319267)
Supplement: ciz486_suppl_supplementary_figures_and_tables.pdf [file ciz486_suppl_supplementary_figures_and_tables.pdf]

## Supplemental Figures and Tables

### Changes in Bone Mass After Discontinuation of Pre-Exposure Prophylaxis (PrEP) with Tenofovir Disoproxil Fumarate/Emtricitabine in Young Men Who Have Sex With Men: Extension Phase Results of Adolescent Trials Network Protocols 110 and 113

Peter L. Havens<sup>1</sup>, Suzanne E. Perumean-Chaney<sup>2</sup>, Amit Patki<sup>2</sup>, Stacey S. Cofield<sup>2</sup>, Craig M. Wilson<sup>3</sup>, Nancy Liu<sup>4</sup>, Peter L. Anderson<sup>5</sup>, Raphael J. Landovitz<sup>6</sup>, Bill G. Kapogiannis<sup>7</sup>, Sybil G. Hosek<sup>8</sup>, Kathleen Mulligan<sup>9</sup>

1. Department of Pediatrics, Medical College of Wisconsin/Children's Hospital of Wisconsin, Milwaukee, WI, USA
2. Department of Biostatistics, University of Alabama at Birmingham, Birmingham, AL, USA
3. Department of Epidemiology, University of Alabama at Birmingham, Birmingham, AL, USA
4. Westat, Rockville, MD, USA
5. Department of Pharmaceutical Sciences, University of Colorado Anschutz Medical Campus, Aurora, CO, USA
6. Department of Medicine, David Geffen School of Medicine, University of California Los Angeles, Los Angeles, CA, USA
7. Maternal and Pediatric Infectious Disease Branch, Eunice Kennedy Shriver National Institute of Child Health and Human Development, Bethesda, MD, USA
8. Department of Psychiatry, Stroger Hospital of Cook County, Chicago, IL, USA
9. Department of Medicine, University of California at San Francisco, Zuckerberg San Francisco General Hospital, San Francisco, CA, USA

Figure 1. Participant Flow Diagram.

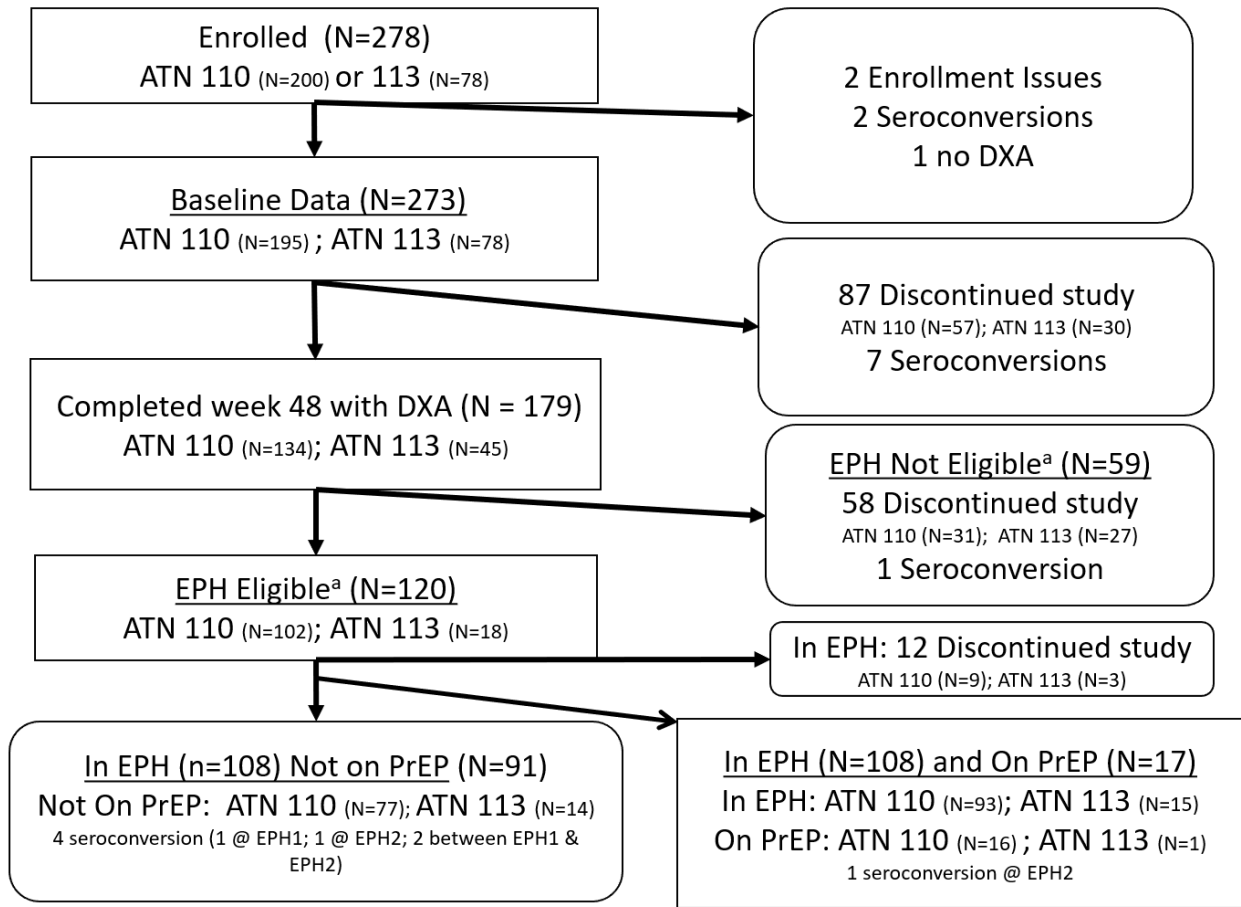

Abbreviations: ATN, Adolescent Trials Network for HIV/AIDS Intervention; DXA, dual-energy X-ray absorptiometry; EPH, extension phase; PrEP, Pre-exposure prophylaxis

a. See text for eligibility criteria.

Supplemental Table 1. Baseline Characteristics of Participants ATN Studies 110/113

| Characteristic                             | All Enrolled <sup>a</sup> | EPH-Eligible | Not EPH-Eligible | <i>p</i> -value  |
|--------------------------------------------|---------------------------|--------------|------------------|------------------|
| N                                          | 273                       | 120          | 59               |                  |
| Age years                                  | 19.1 ± 2.0                | 19.7 ± 1.8   | 18.4 ± 2.1       | <b>&lt;0.001</b> |
| Hispanic                                   | 87 (31.8%)                | 37 (30.8%)   | 23 (39.0%)       | 0.551            |
| Black/African American                     | 141 (51.6%)               | 67 (55.8%)   | 28 (47.5%)       | 0.291            |
| Alcohol                                    | 219 (82.0%)               | 100 (84.0%)  | 45 (78.9%)       | 0.407            |
| BMI kg/m <sup>2</sup>                      | 24.9 ± 6.6                | 25.8 ± 7.3   | 24.3 ± 6.5       | 0.184            |
| Tanner Stage                               | 4.82 ± 0.46               | 4.88 ± 0.37  | 4.75 ± 0.51      | 0.069            |
| Whole-body BMD g/cm <sup>2</sup>           | 1.19 ± 0.11               | 1.19 ± 0.11  | 1.15 ± 0.11      | <b>0.019</b>     |
| Whole-body Z-score                         | -0.29 ± 1.08              | -0.36 ± 1.07 | -0.47 ± 1.02     | 0.507            |
| Whole-body BMC                             | 2668 ± 454                | 2702.9 ± 445 | 2521 ± 452       | <b>0.011</b>     |
| Lumbar spine (L1-L4) BMD g/cm <sup>2</sup> | 1.08 ± 0.15               | 1.08 ± 0.14  | 1.04 ± 0.15      | 0.105            |
| Lumbar spine z-score                       | -0.36 ± 1.12              | -0.45 ± 1.12 | -0.45 ± 1.11     | 0.974            |
| Total hip BMD g/cm <sup>2</sup>            | 1.09 ± 0.16               | 1.09 ± 0.15  | 1.06 ± 0.17      | 0.257            |
| Total hip Z-score                          | -0.20 ± 0.98              | -0.25 ± 0.95 | -0.32 ± 1.00     | 0.652            |
| History of fractures                       | 55 (20.2%)                | 25 (20.8%)   | 10 (16.9%)       | 0.538            |
| Week 48 TFV-DP fmol/punch <sup>b</sup>     | 775 ± 575                 | 864 ± 613    | 585 ± 412        | <b>0.009</b>     |
| Week 48 TFV-DP classification              |                           |              |                  | 0.361            |
| >700                                       | 52 (32.5%)                | 40 (37.7%)   | 12 (23.5%)       |                  |
| 350-700                                    | 20 (12.5%)                | 13 (12.3%)   | 7 (13.7%)        |                  |
| Detectable-350                             | 31 (19.4%)                | 19 (17.9%)   | 11 (21.6%)       |                  |
| BLQ                                        | 57 (35.6%)                | 34 (32.1%)   | 21 (41.2%)       |                  |

Abbreviations: BLQ, below the limit of quantitation; BMC, bone mineral content; BMD, bone mineral density; BMI, body mass index; EPH, Extension Phase; TFV-DP, tenofovir diphosphate

a. Data presented as Mean ± SD or N (%)

b. TFV-DP values are not imputed. The sample sizes for TFV-DP measurements are 103, 72, and 30 for all enrolled, EPH-eligible, and not EPH-eligible, respectively.

Supplemental Table 2. Baseline Characteristics of Participants Meeting Criteria for Extension Phase By Age

| Characteristic                             | EPH-Eligible <sup>a</sup> | Ages 15-19 years | Ages 20-22 years | p-value          |
|--------------------------------------------|---------------------------|------------------|------------------|------------------|
| N                                          | 120                       | 54               | 66               |                  |
| Age years                                  | 19.7 ± 1.8                | 18.0 ± 1.2       | 21.0 ± 0.8       | <b>&lt;0.001</b> |
| Hispanic                                   | 37 (30.8%)                | 20 (37.0%)       | 17 (25.8%)       | 0.206            |
| Black/African American                     | 67 (55.8%)                | 29 (53.7%)       | 38 (57.6%)       | 0.671            |
| Alcohol                                    | 100 (84.0%)               | 40 (75.5%)       | 60 (90.9%)       | <b>0.022</b>     |
| Marijuana                                  | 61 (51.3%)                | 28 (52.8%)       | 33 (50.0%)       | 0.759            |
| Height cm                                  | 175.0 ± 6.5               | 174.5 ± 6.3      | 175.3 ± 6.7      | 0.518            |
| Weight kg                                  | 79.2 ± 22.9               | 77.4 ± 23.1      | 80.6 ± 22.9      | 0.440            |
| BMI kg/m <sup>2</sup>                      | 25.8 ± 7.3                | 25.5 ± 8.1       | 26.1 ± 6.6       | 0.629            |
| Tanner Stage                               | 4.88 ± 0.37               | 4.83 ± 0.42      | 4.92 ± 0.32      | 0.195            |
| Whole-body BMD g/cm <sup>2</sup>           | 1.19 ± 0.11               | 1.19 ± 0.12      | 1.19 ± 0.10      | 0.729            |
| Whole-body Z-score                         | -0.36 ± 1.07              | -0.22 ± 1.11     | -0.48 ± 1.02     | 0.184            |
| Whole-body BMC                             | 2703 ± 445                | 2663 ± 470       | 2735 ± 425       | 0.383            |
| Lumbar spine (L1-L4) BMD g/cm <sup>2</sup> | 1.08 ± 0.14               | 1.06 ± 0.15      | 1.08 ± 0.14      | 0.435            |
| Lumbar spine z-score                       | -0.45 ± 1.12              | -0.22 ± 1.05     | -0.64 ± 1.14     | <b>0.041</b>     |
| Total hip BMD g/cm <sup>2</sup>            | 1.09 ± 0.15               | 1.09 ± 0.15      | 1.09 ± 0.14      | 0.798            |
| Total hip Z-score                          | -0.25 ± 0.95              | -0.09 ± 0.88     | -0.38 ± 1.00     | 0.105            |
| History of fractures                       | 25 (20.83%)               | 10 (18.52%)      | 15 (22.73%)      | 0.572            |
| Week 48 TFV-DP fmol/punch <sup>b</sup>     | 864 ± 613                 | 759 ± 654        | 943 ± 574        | 0.208            |
| Week 48 TFV-DP classification              |                           |                  |                  | 0.216            |
| >700                                       | 40 (37.7%)                | 13 (27.7%)       | 27 (45.8%)       |                  |
| 350-700                                    | 13 (12.3%)                | 8 (17.0%)        | 5 (8.5%)         |                  |
| Detectable-350                             | 19 (17.9%)                | 10 (21.3%)       | 9 (15.2%)        |                  |
| BLQ                                        | 34 (32.1%)                | 16 (34.0%)       | 18 (30.5%)       |                  |

Abbreviations: BLQ, below the limit of quantitation; BMC, bone mineral content; BMD, bone mineral density; BMI, body mass index; EPH, Extension Phase; TFV-DP, tenofovir diphosphate

a. Data presented as Mean ± SD or N (%)

b. TFV-DP values are not imputed. The sample sizes TFV-DP measurements are 72, 31, and 41 for EPH-eligible, Age 15-19, and Age 20-22, respectively.

Figure 2. Changes in bone mass during TDF/FTC PrEP (baseline to week 48) and following PrEP discontinuation (week 48 to the second extension phase visit 48 weeks after stopping PrEP; EPH2) in HIV-seronegative young men who have sex with men (YMSM). Data are presented as percent change in bone mineral density (A) or change in Z-scores from baseline (B) and change in Z-score from baseline by age category for lumbar spine BMD (C) in YMSM who met one or more pre-specified criteria for bone toxicity while receiving PrEP (see text).

Abbreviations: BMD, bone mineral density; EPH1, extension phase visit 1, 24 weeks after stopping PrEP; EPH2, extension phase visit 2, 48 weeks after stopping PrEP; TDF/FTC, tenofovir disoproxil fumarate / emtricitabine; Wk, week

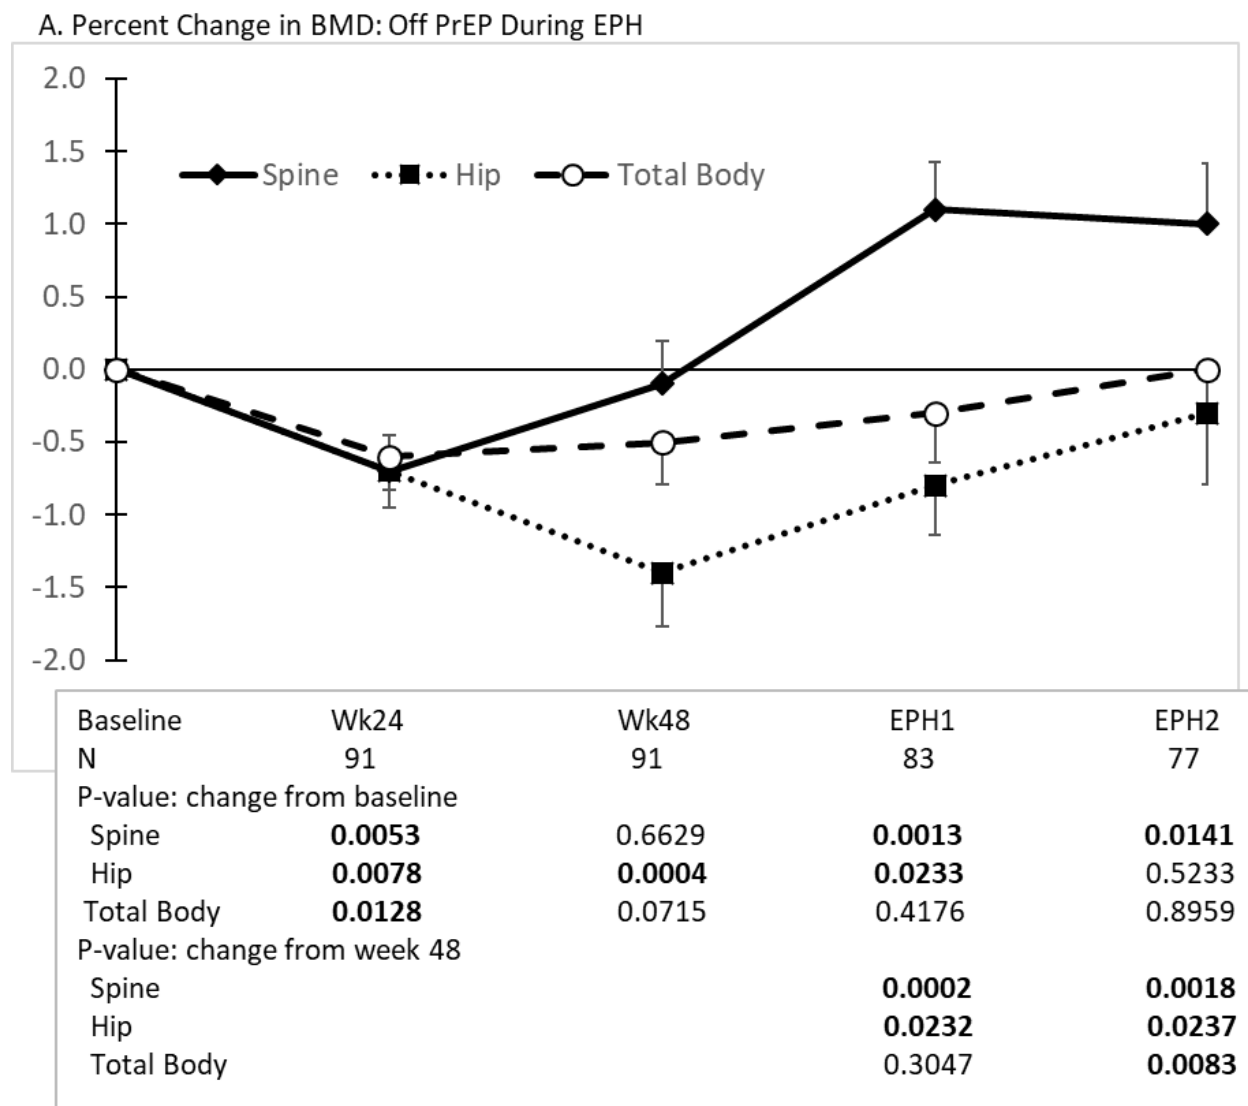

B. Absolute Change in BMD Z-Scores: Off PrEP During EPH

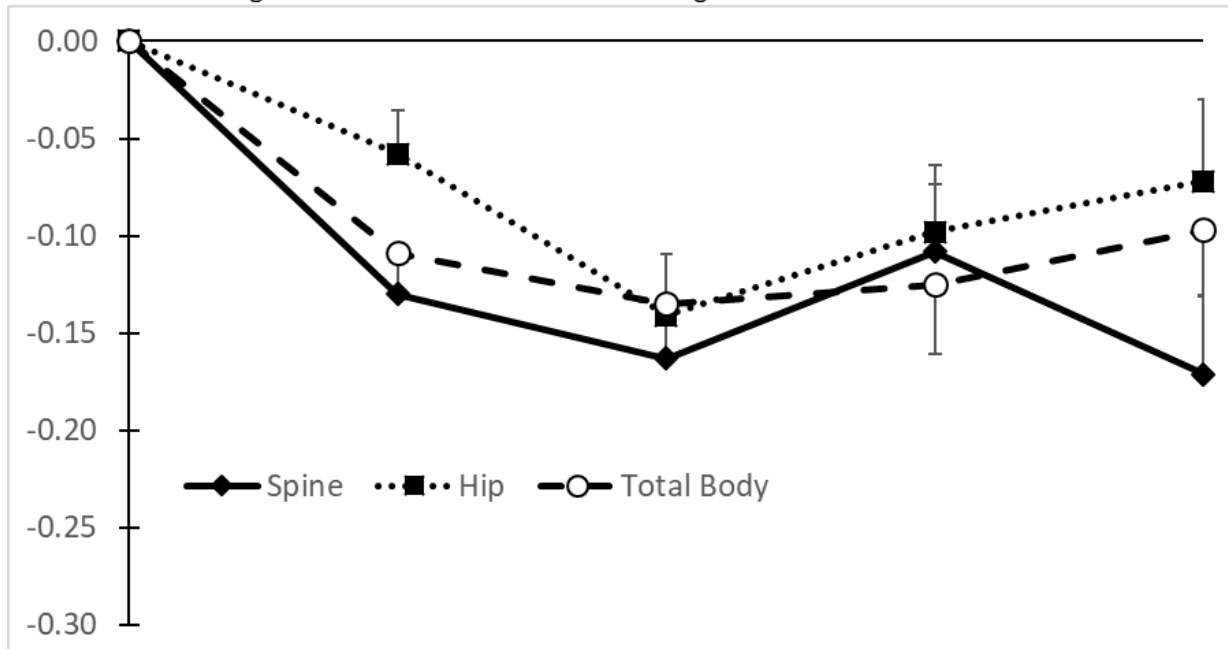

| Baseline                      | Wk24              | Wk48              | EPH1          | EPH2              |
|-------------------------------|-------------------|-------------------|---------------|-------------------|
| N                             | 91                | 91                | 83            | 77                |
| P-value: change from baseline |                   |                   |               |                   |
| Spine                         | <b>&lt;0.0001</b> | <b>&lt;0.0001</b> | <b>0.0022</b> | <b>&lt;0.0001</b> |
| Hip                           | <b>0.0113</b>     | <b>&lt;0.0001</b> | <b>0.0054</b> | 0.0918            |
| Total Body                    | <b>&lt;0.0001</b> | <b>&lt;0.0001</b> | <b>0.0008</b> | <b>0.0052</b>     |
| P-value: change from week 48: |                   |                   |               |                   |
| Spine                         |                   |                   | 0.1057        | 0.8834            |
| Hip                           |                   |                   | 0.0673        | 0.1007            |
| Total Body                    |                   |                   | 0.8555        | 0.1925            |

C. Absolute Change in Spine BMD Z-Score by Age: Off PrEP During EPH

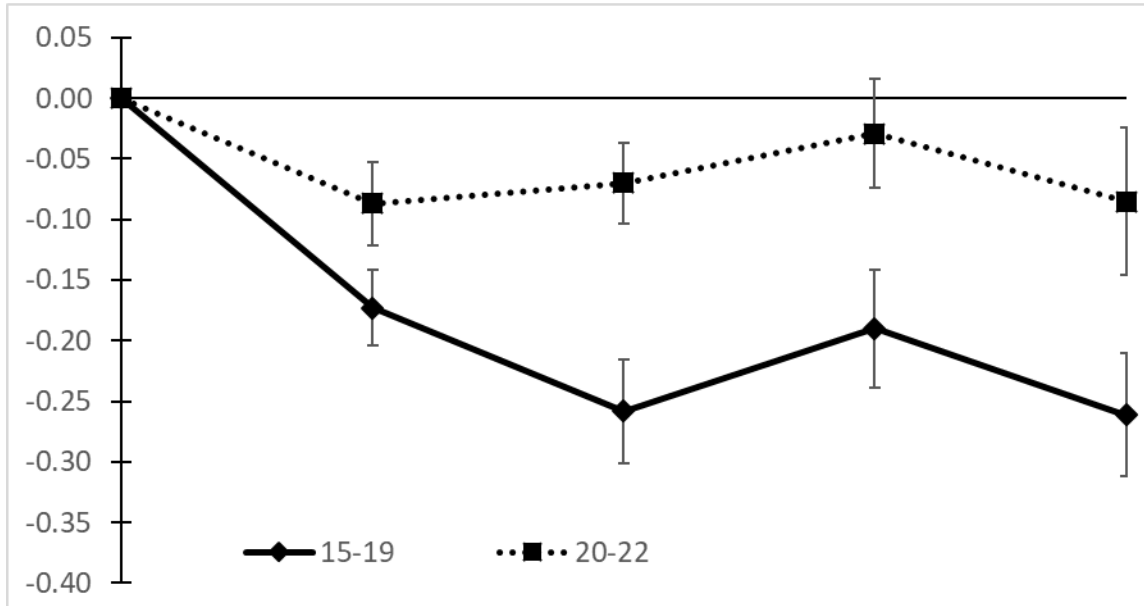

|                                                                                     | Wk24             | Wk48             | EPH1             | EPH2             |
|-------------------------------------------------------------------------------------|------------------|------------------|------------------|------------------|
| Baseline                                                                            |                  |                  |                  |                  |
| N 15-19                                                                             | 45               | 45               | 41               | 38               |
| N 20-22                                                                             | 46               | 46               | 42               | 39               |
| Baseline difference between age groups: p = 0.1200                                  |                  |                  |                  |                  |
| P-value for difference between age groups in change from baseline to each timepoint |                  |                  |                  |                  |
| 15-19 vs 20-22                                                                      | 0.0633           | <b>0.0008</b>    | <b>0.0175</b>    | <b>0.0299</b>    |
| 15-19 age group P-values for change:                                                |                  |                  |                  |                  |
| From Baseline                                                                       | <b>&lt;0.001</b> | <b>&lt;0.001</b> | <b>&lt;0.001</b> | <b>&lt;0.001</b> |
| From wk48                                                                           |                  |                  | 0.141            | 0.141            |
| 20-22 age group P-values for change:                                                |                  |                  |                  |                  |
| From Baseline                                                                       | <b>0.014</b>     | <b>0.043</b>     | 0.531            | 0.174            |
| From wk48                                                                           |                  |                  | 0.441            | 0.964            |
